# Supplementary material for: A series of new manganese thioarsenates(v) based on different unsaturated [Mn(amine)x]2+complexes
Source: Royal Society of Chemistry journal article supplement (doi:10.1039/c5dt02910d), 2015-01-01
Supplement: c5dt02910d1.pdf [file c5dt02910d1.pdf]

Supporting Information

**A series of new manganese thioarsenates(V) based on different unsaturated  
[Mn(amine)<sub>x</sub>]<sup>2+</sup> complexes**

Jian Zhou, Xiao-Feng Tan, Xing Liu, Miao Qing, Rong-Qing Zhao, and Qiuling Tang

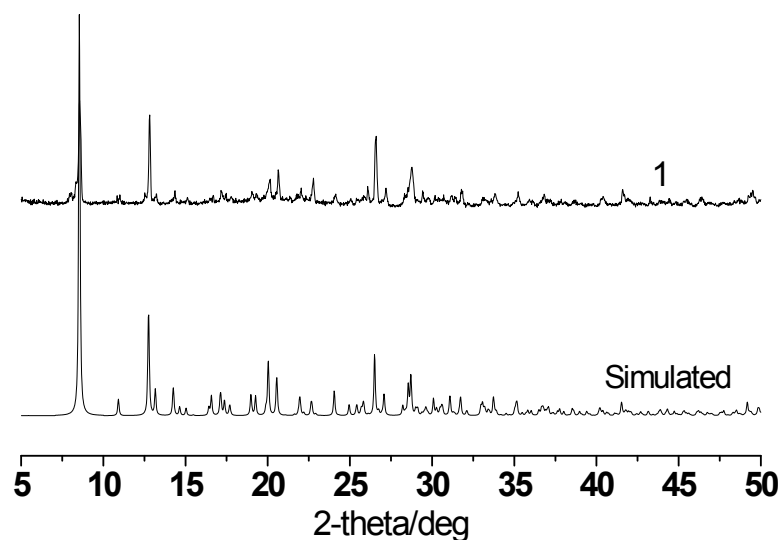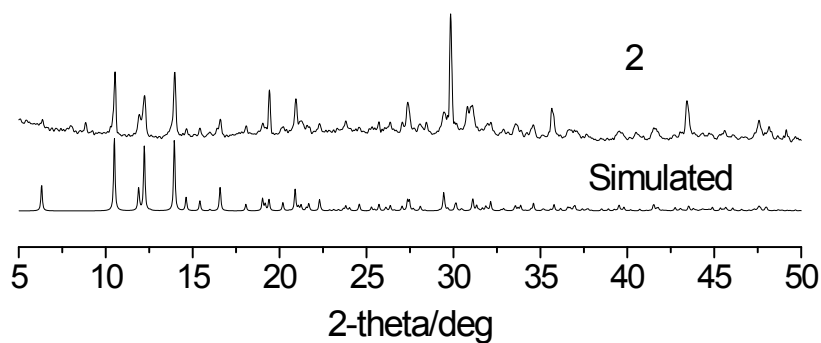

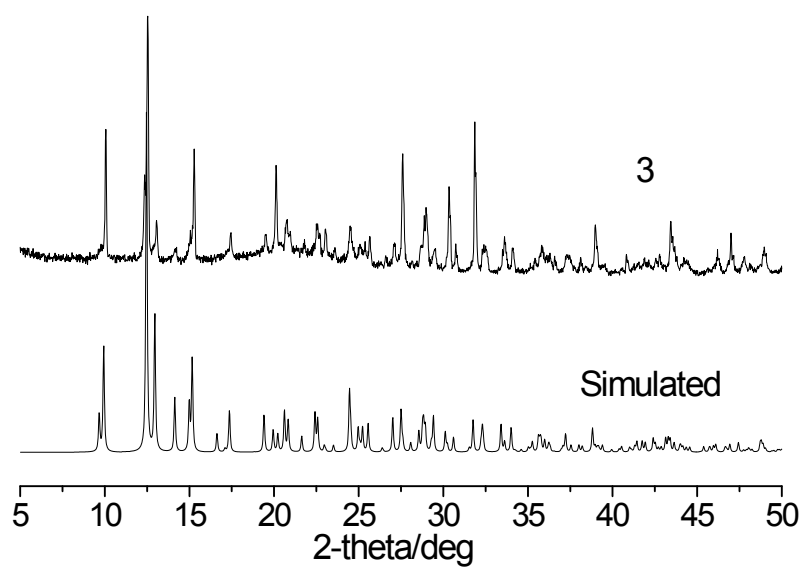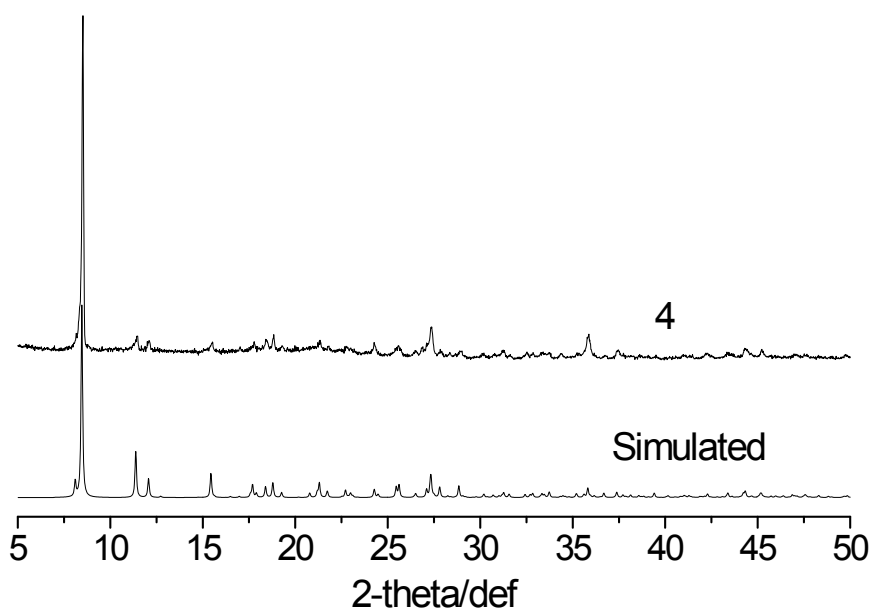

Fig. S1 Experimental and simulated powder XRD patterns.( The simulated XRD pattern of **1-4** is slightly different from the measured one. It means that **1-4** are sensitive to the moisture and air)

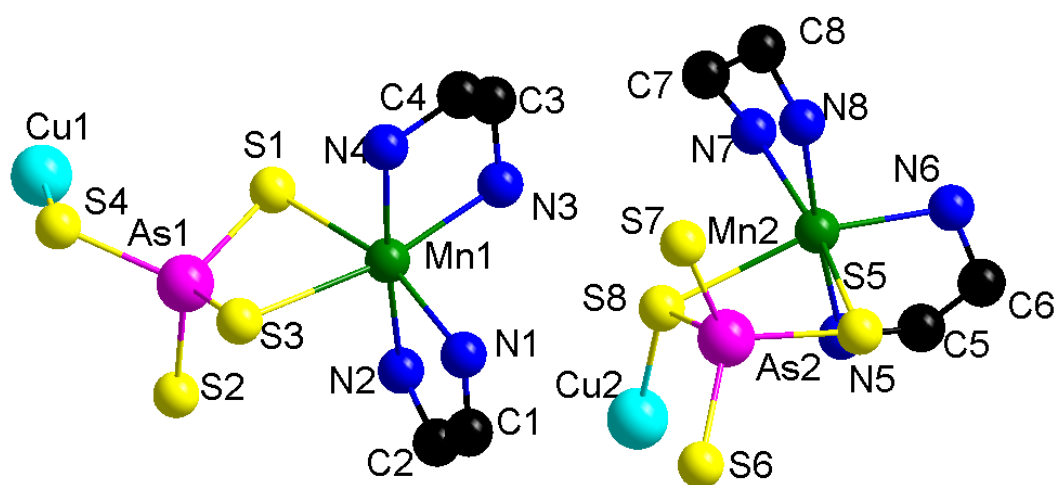

Fig. S2 The asymmetric unit of **1** (H atoms bonded to C and N atoms have been omitted for clarity).

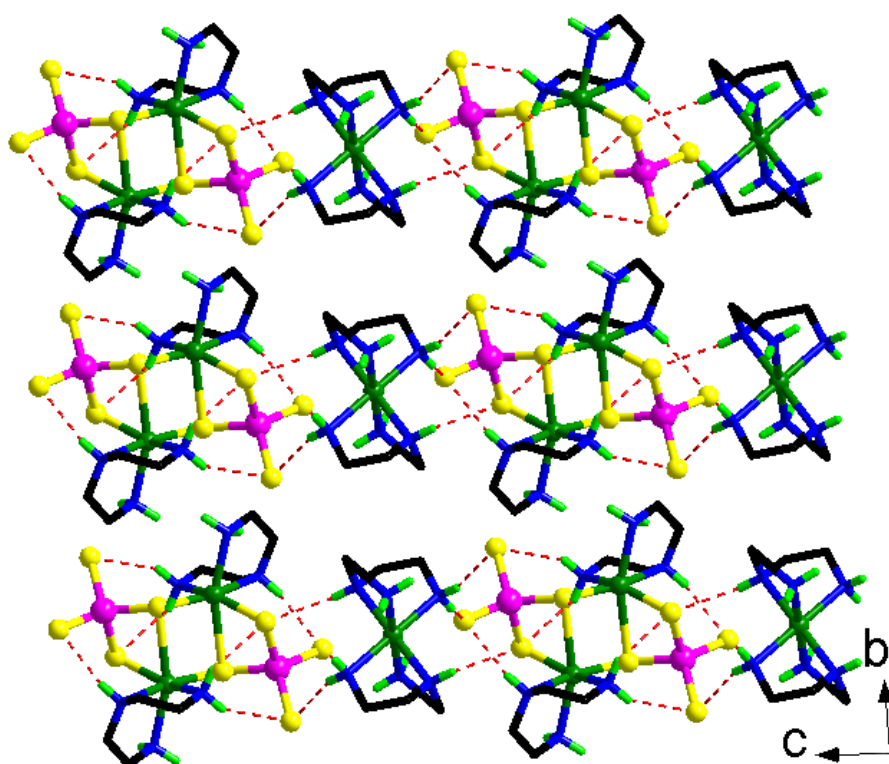

Fig. S3 The crystal packing of **2**.

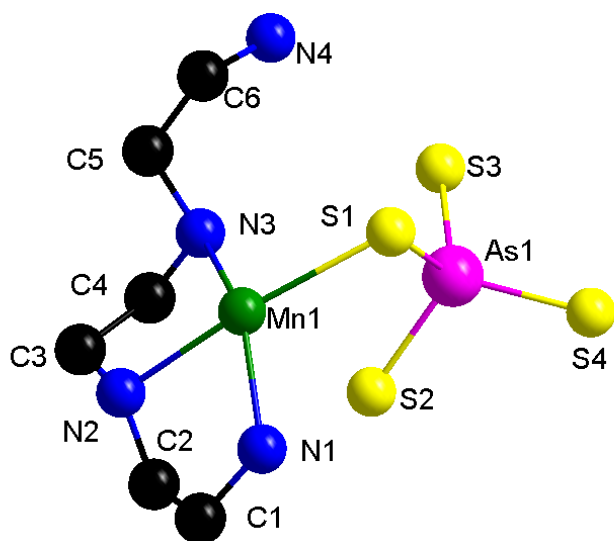

Fig. S4 The asymmetric unit of **3** (H atoms bonded to C and N atoms have been omitted for clarity).

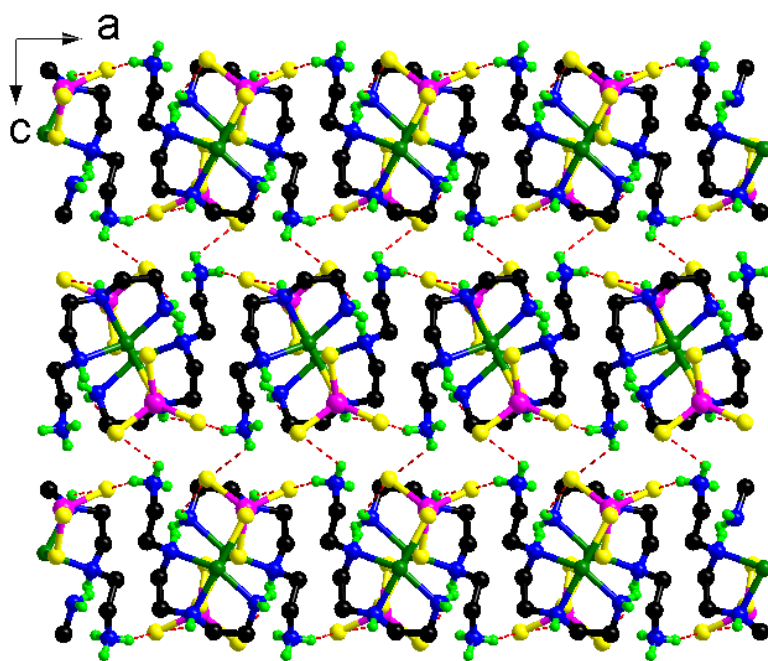

Fig. S5 3-D hydrogen bonding network structure.

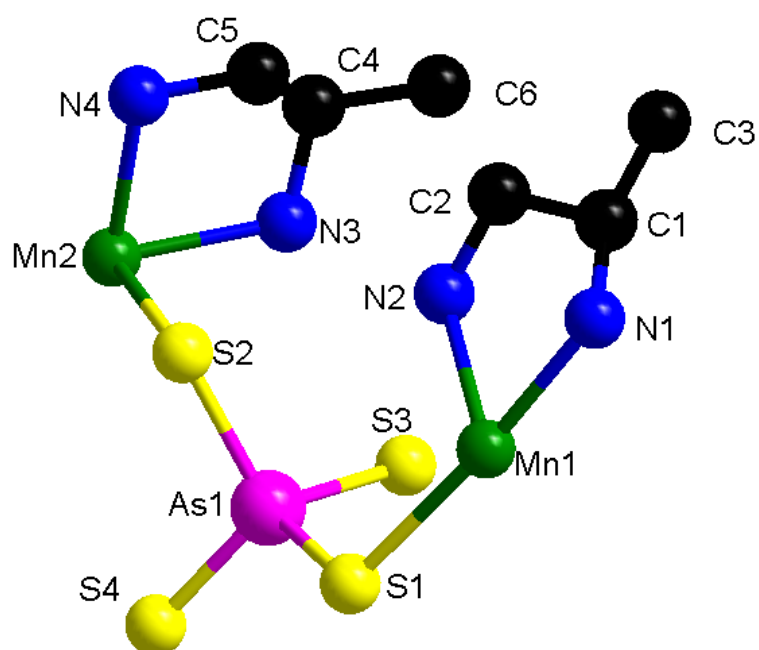

Fig. S6 The asymmetric unit of **4** (H atoms bonded to C and N atoms have been omitted for clarity).

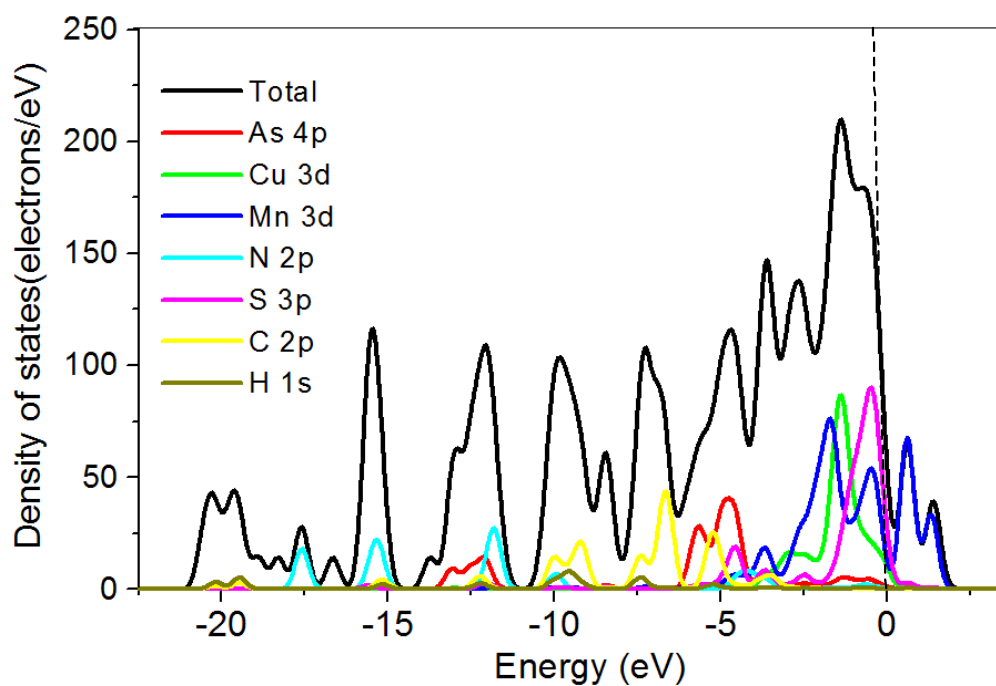

Fig. S7 Total and partial DOS for **1**. The Fermi level is set at 0 eV (dotted line).

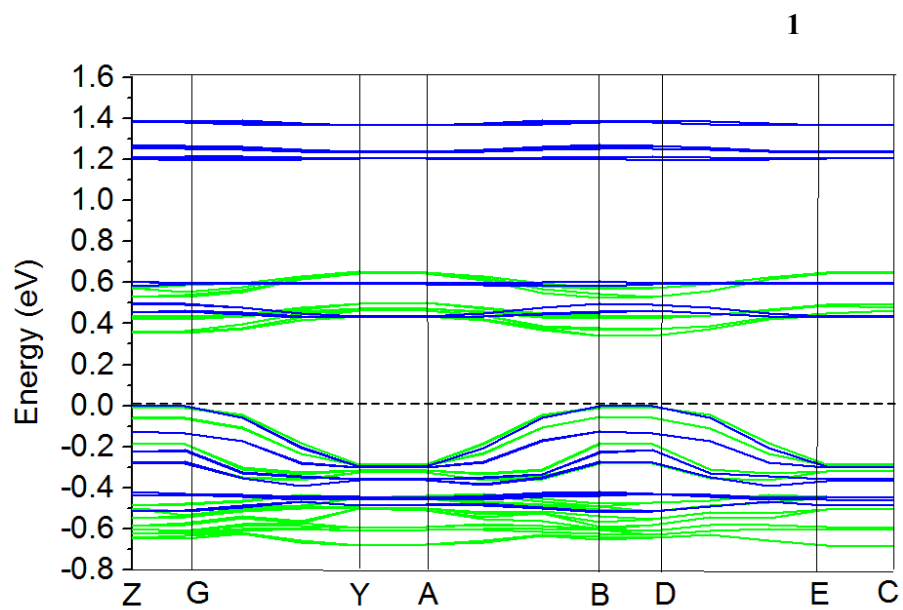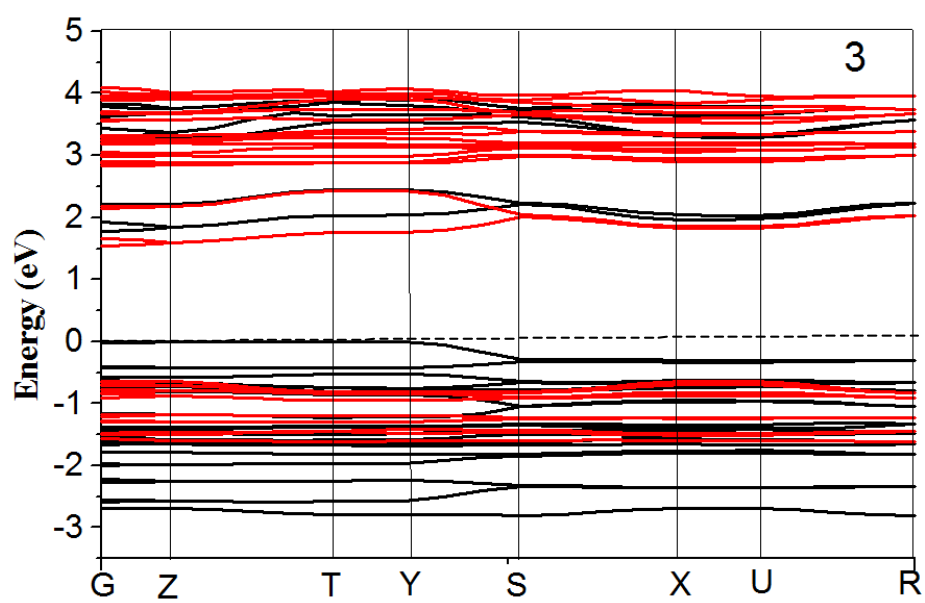

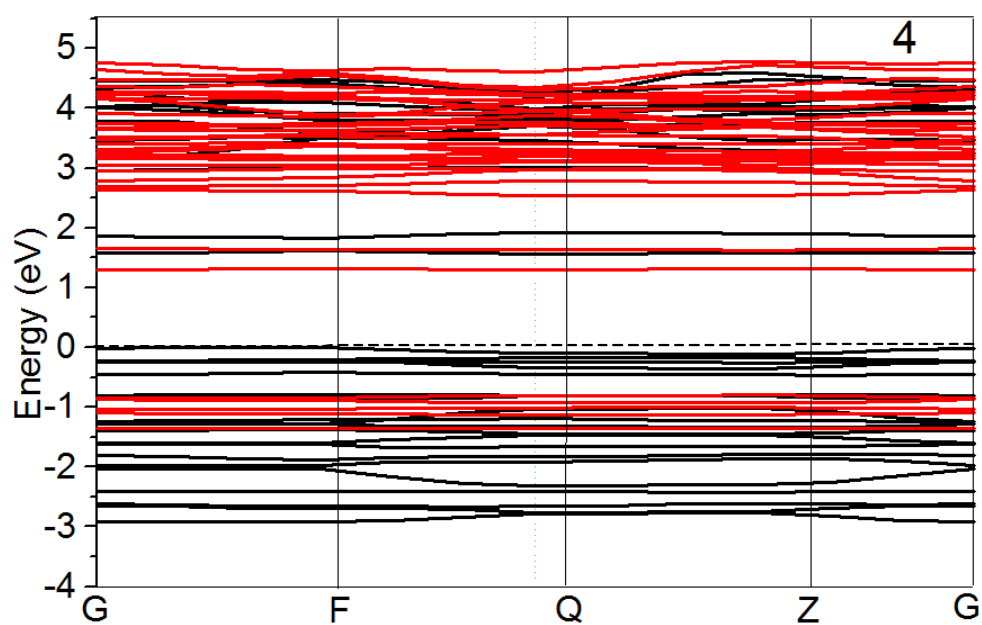

Fig. S8 The calculated band structures of **1**, **3** and **4**. The Fermi level is set at 0 eV (dotted line).
